# Supplementary material for: Syringobulbia in Patients with Chiari Malformation Type I: A Systematic Review
Source: Hindawi journal article supplement (doi:10.1155/2019/4829102), 2019-03-19
Supplement: f1 [file 4829102.f1.pdf]

Supplementary Table: summary of three extra case series of CM-I patients with syringobulbia.

| Author(s),<br>Year      | Old | Sex                                        | Manifestations                                       | Examination Findings                                        | Extent of SB                                   | Extent of SM                             | Operation                                                                | Outcome                          | Follow-Up |
|-------------------------|-----|--------------------------------------------|------------------------------------------------------|-------------------------------------------------------------|------------------------------------------------|------------------------------------------|--------------------------------------------------------------------------|----------------------------------|-----------|
| Menezes, A.<br>H., 2018 | 12  | F                                          | Limb weakness, diplopia,<br>snoring                  | CN VI, IX, X, XII palsies, Hyperreflexia,<br>ptosis,        | Medulla-pons,<br>midbrain, no V4<br>connection | Holocord                                 | Gliotic tonsils, veil over FM                                            | Resolved except<br>tongue fascic | 20 yrs    |
|                         | 12  | F                                          | Headache, diplopia, limb<br>weakness                 | Nystagmus, dysesthesia, hemiparesis,<br>hyperreflexia       | Medulla                                        | Holocord                                 | Transoral decompration, PFD                                              | Resolved                         | 4 yrs     |
|                         | 14  | F                                          | Poor coordination;<br>headache, dysphagia            | Nystagmus; spastic throughout; CN IX &<br>X palsies         | Medulla (left)                                 | Cervical                                 | Transoral decompration,<br>PFD; veil over FM                             | Persistent<br>hyperreflexia      | 12 yrs    |
|                         | 15  | F                                          | Headache, dysphagia,<br>ataxia, numbness             | CN V, IX, X palsies                                         | Age 1 yr: none<br>Age 15 yrs: medulla          | cervicothoracic                          | PFD, VP-shunt, Transoral<br>decompression medulla,<br>gliosis, FM closed | Mild ataxia                      | 15 yrs    |
|                         | 17  | M                                          | Headache, sleep apnea,<br>arm pain & numbness        | CN V, IX, X palsies, arm dysesthesia,<br>thoracic scoliosis | Medulla (left)                                 | Holocord                                 | SB opened into floor of V4                                               | Resolved                         | 13 yrs    |
|                         | 17  | M                                          | Sleep apnea,<br>kyphoscoliosis, face numb,<br>ptosis | Horner's syndrome, CN V, IX, & X palsy                      | Medulla                                        | Holocord                                 | Veil occluding V4                                                        | Resolved                         | 20yrs     |
|                         | 11  | F                                          | headache; neck pain;<br>incoordination; diplopia     | Ataxia, CN IX & X palsies; hyperreflexia                    | Medulla                                        | Cervical                                 | Entire (rt) tonsil in V4                                                 | Resolved                         | 18yrs     |
|                         | 16  | F                                          | Headache, scoliosis                                  | Ataxia, CN IX & X palsies, dysesthesia,<br>hyporeflexia     | Medulla (left)                                 | Holocord, side tract in<br>medulla to V4 | Tonsils in V4; veil over FM                                              | Improved                         | 12yrs     |
|                         | 18  | M                                          | Arm pain                                             | CN IX & X palsies                                           | Medulla; no V4<br>connection                   | Holocord                                 | Right tonsil filled V4                                                   | Resolved                         | 4 yrs     |
| 15                      | M   | Limb weakness and<br>dysesthesia, headache | Horner's syndrome, hyperreflexia                     | Whole brain stem,<br>syringocephaly                         | Holocord                                       | Severe scar over FM                      | Improved                                                                 | 4yrs                             |           |

|                       |    |   |                                                          |                                                                                         |                           |                        |                                                                |                                        |      |
|-----------------------|----|---|----------------------------------------------------------|-----------------------------------------------------------------------------------------|---------------------------|------------------------|----------------------------------------------------------------|----------------------------------------|------|
|                       | 18 | M | Sleep apnea; headache; neck pain; dysphagia dysarthria   | Nystagmus, CN IX & X palsies, horner's syndrome, tough fasciculation; palatal myoclonus | Medulla (left), ventrally | Holochord              | Rt tonsil filled V4; veil over FM                              | Improved                               | 6yrs |
|                       | 14 | F | Headache, diplopia; scoliosis; incoordination            | CN IX & X palsies; nystagmus; scoliosis; hyperreflexia,                                 | Medulla                   | Cervical               | Veil over foramen magnum; PFD and O-C2 fusion                  | Resolved                               | 3yrs |
|                       | 16 | M | Headache, dysphagia                                      | CN IX & X palsies; hyperreflexia, dysesthesia                                           | VP shunt                  | holochord              | VP shunt                                                       | Improved                               | 1yr  |
| Greenlee, J.,<br>2005 | 12 | F | Diplopia, snoring                                        | L VI, IX, X, XII palsies; ptosis; hand intrinsic weakness; foot drop; hyperreflexia     | Medulla-inferior pons     | Holochord              | Posterior fossa decompression, C-1 laminectomy, and duraplasty | Tongue fasciculations otherwise normal | 4.1  |
|                       | 12 | F | Diplopia, headache                                       | Mild hemiparesis; nystagmus; hyperreflexia; C2 hypesthesia                              | Medulla                   | Holochord              | Posterior fossa decompression, C-1 laminectomy, and duraplasty | Hyperreflexic lower extremities        | 2.5  |
|                       | 14 | F | Gait instability, incoordination                         | Nystagmus; hyperreflexia                                                                | Medulla                   | Cervica                | Posterior fossa decompression, C-1 laminectomy, and duraplasty | Hyperreflexic                          | 1.8  |
|                       | 15 | F | Head and neck pain, dysphagia, hand paresthesia, snoring | L IX, X palsies; hyperreflexia; hand weakness                                           | Medulla                   | Cervical               | Posterior fossa decompression, C-1 laminectomy, and duraplasty | Normal                                 | 3.5  |
|                       | 17 | M | "Eyes bouncing," arm paresthesias, snoring, sleep apnea  | CN V palsy; upper extremity hypesthesia; hyperreflexia; thoracic scoliosis              | Medulla                   | Holochord              | Posterior fossa decompression, C-1 laminectomy, and duraplasty | Normal                                 | 3.2  |
|                       | 17 | M | Numbness L face, eye droop, snoring                      | Ptosis, enophthalmos; face, limb hypesthesia, hypalgesia; hyporeflexia; scoliosis       | Medulla                   | Holochord              | Posterior fossa decompression, C-1 laminectomy, and duraplasty | Improved                               | 4.1  |
| Botelho, R.,          | 38 | F | Left hemiparesthesia                                     | Left hemiparesthesia suspended                                                          | None                      | cervicothoracic(C1-T8) | None                                                           | None                                   | -    |

| 2000 |   |                                                         |                                                                                                         |      |                        |      |      |   |
|------|---|---------------------------------------------------------|---------------------------------------------------------------------------------------------------------|------|------------------------|------|------|---|
|      |   |                                                         | anesthesia T4-T8                                                                                        |      |                        |      |      |   |
| 39   | F | Spastic tetraparesis, atrophy of the hands, snoring     | Suspended dissociated anesthesia C6-T1                                                                  | None | cervicothoracic(C2-T6) | None | None | - |
| 34   | F | Cerebellar ataxia, dysphagia, snoring                   | Cerebellar ataxia, Dysphagia                                                                            | None | None                   | None | None | - |
| 45   | M | Vertigo, snoring                                        | Nystagmus                                                                                               | None | cervicothoracic(C2-T4) | None | None | - |
| 54   | M | Brachial paresis, snoring                               | Hemipalatoparesis, dysphagia                                                                            | None | Cervical               | None | None | - |
| 42   | F | Sensory disturbance, snoring                            | Right arm paresthesia and paresis, left leg paresis, right arm hypoesthesia                             | None | None                   | None | None | - |
| 31   | F | Atrophy of the hands, Snoring                           | Fasciculation of the hands, painful anesthesia in the lower limbs, sensitive dissociation between T1-T6 | None | cervicothoracic(C3-T6) | None | None | - |
| 50   | M | Spastic tetraparesis, Snoring                           | Fasciculation of the upper limbs, neck, and tongue                                                      | None | None                   | None | None | - |
| 34   | F | Atrophy of the left hand, burning hands, snoring        | Burning hands, left-hand atrophy                                                                        | None | cervicothoracic(C1-T6) | None | None | - |
| 70   | F | Complete left paresis, snoring                          | Complete left paresis                                                                                   | None | None                   | None | None | - |
| 59   | M | Anakusis, facial paresis, spastic tetraparesis, snoring | Anakusis, facial paresis, spastic tetraparesis                                                          | None | None                   | None | None | - |

C: cervical, CN: cranial nerve, ETV: endoscopic third ventriculostomy, F: female, FMD: foramen magnum decompression, ICP: intracranial pressure, M: male, m: month(s), O: occipital, PDF: posterior foramen decompression, SB: syringobulbia, SM: syringomyelia, T: thoracic, yr(s): year(s), VP: ventriculo-peritoneal.
